# Supplementary material for: Weight Matters—Factors Influencing Eating Behaviors of Vulnerable Women
Source: MDPI journal article supplement (doi:10.3390/nu11081809), 2019-08-06
Supplement: s1 [file s1]

## Demographic, Socioeconomic and Health Status Form

English version

|                                               |                                                                                                                                                                                                                                           |                       |  |
|-----------------------------------------------|-------------------------------------------------------------------------------------------------------------------------------------------------------------------------------------------------------------------------------------------|-----------------------|--|
| Date of interview:                            |                                                                                                                                                                                                                                           | Participant's Number: |  |
| <b>PARTICIPANT'S CHARACTERISTICS</b>          |                                                                                                                                                                                                                                           |                       |  |
| <b>DEMOGRAPHICS</b>                           |                                                                                                                                                                                                                                           |                       |  |
| <b>1. Date of Birth:</b>                      |                                                                                                                                                                                                                                           |                       |  |
| <b>2. Marital Status:</b>                     | <input type="checkbox"/> Single<br><input type="checkbox"/> Cohabitant<br><input type="checkbox"/> Married<br><input type="checkbox"/> Divorced<br><input type="checkbox"/> Separated<br><input type="checkbox"/> Widow                   |                       |  |
| <b>3. Children in charge</b>                  | <input type="checkbox"/> Yes<br><input type="checkbox"/> No                                                                                                                                                                               |                       |  |
|                                               | Number of children:                                                                                                                                                                                                                       |                       |  |
|                                               | Ages of children:                                                                                                                                                                                                                         |                       |  |
| <b>4. Educational Attainment</b>              | <input type="checkbox"/> Elementary<br><input type="checkbox"/> Vocational<br><input type="checkbox"/> Master / PhD<br><input type="checkbox"/> High School<br><input type="checkbox"/> Higher Education<br><input type="checkbox"/> None |                       |  |
| <b>5. Level of Employment</b>                 | <input type="checkbox"/> Employed<br><input type="checkbox"/> Unemployed                                                                                                                                                                  |                       |  |
|                                               | Current or past occupation:                                                                                                                                                                                                               |                       |  |
| <b>6. Type of housing</b>                     | <input type="checkbox"/> House<br><input type="checkbox"/> Apartment                                                                                                                                                                      |                       |  |
|                                               | <input type="checkbox"/> Other:                                                                                                                                                                                                           |                       |  |
| <b>7. Homeownership</b>                       | <input type="checkbox"/> Own<br><input type="checkbox"/> Rent                                                                                                                                                                             |                       |  |
|                                               | <input type="checkbox"/> Other:                                                                                                                                                                                                           |                       |  |
| <b>8. Number of people that live at home:</b> |                                                                                                                                                                                                                                           |                       |  |

|                                                                                                                                                  |                                                                                                                                                                                                                                       |  |
|--------------------------------------------------------------------------------------------------------------------------------------------------|---------------------------------------------------------------------------------------------------------------------------------------------------------------------------------------------------------------------------------------|--|
| <b>9. Head of household</b>                                                                                                                      | <input type="checkbox"/> Participant<br><input type="checkbox"/> Spouse / Partner<br><input type="checkbox"/> Parents in law<br><input type="checkbox"/> Parents of the participant<br><input type="checkbox"/> Son / daughter        |  |
|                                                                                                                                                  | <input type="checkbox"/> Other:                                                                                                                                                                                                       |  |
| <b>10. People that contribute economically at home</b>                                                                                           | <input type="checkbox"/> Participant<br><input type="checkbox"/> Parents in law<br><input type="checkbox"/> Spouse / Partner<br><input type="checkbox"/> Parents of the participant<br><input type="checkbox"/> Son / daughter        |  |
|                                                                                                                                                  | <input type="checkbox"/> Other:                                                                                                                                                                                                       |  |
| <b>If the participant is not the head of household, please answer the following questions about the person who is the head of the household:</b> |                                                                                                                                                                                                                                       |  |
| <b>11. Educational Attainment</b>                                                                                                                | <input type="checkbox"/> Elementary<br><input type="checkbox"/> High School<br><input type="checkbox"/> Vocational<br><input type="checkbox"/> Higher Education<br><input type="checkbox"/> Graduate<br><input type="checkbox"/> None |  |
| <b>12. Level of Employment</b>                                                                                                                   | <input type="checkbox"/> Employed<br><input type="checkbox"/> Unemployed                                                                                                                                                              |  |
|                                                                                                                                                  | Current or past occupation:                                                                                                                                                                                                           |  |
| <b>13. Total income at home:</b>                                                                                                                 |                                                                                                                                                                                                                                       |  |

| HEALTH RELATED INFORMATION                                                                                                                                                                                                                                  |                                                                                                                                                                              |
|-------------------------------------------------------------------------------------------------------------------------------------------------------------------------------------------------------------------------------------------------------------|------------------------------------------------------------------------------------------------------------------------------------------------------------------------------|
| <b>14. Health insurance</b>                                                                                                                                                                                                                                 | <input type="checkbox"/> Public<br><input type="checkbox"/> Private                                                                                                          |
| <b>15. Presence of Chronic Disease</b>                                                                                                                                                                                                                      | <input type="checkbox"/> Yes<br><input type="checkbox"/> No                                                                                                                  |
|                                                                                                                                                                                                                                                             | <input type="checkbox"/> Diabetes<br><input type="checkbox"/> Hypertension<br><input type="checkbox"/> Hypercholesterolemia<br><input type="checkbox"/> Hypertriglyceridemia |
|                                                                                                                                                                                                                                                             | <input type="checkbox"/> Other:                                                                                                                                              |
|                                                                                                                                                                                                                                                             |                                                                                                                                                                              |
| PHYSICAL ACTIVITY                                                                                                                                                                                                                                           |                                                                                                                                                                              |
| During the past month, other than your regular job, did you participate in any physical activities or exercises such as running, calisthenics, golf, gardening, or walking for exercise?<br><br><input type="checkbox"/> Yes<br><input type="checkbox"/> No |                                                                                                                                                                              |
| 17. What type of physical activity or exercise did you spend the most time doing during the past month?<br><br>ANSWER:                                                                                                                                      |                                                                                                                                                                              |
